# Supplementary material for: Inflammatory stress-mediated chromatin changes underlie dysfunction in endothelial cells
Source: PubMed Central journal article supplement — bioRxiv. 2023 Oct 16:2023.10.11.561959. Preprint. [Version 1] doi: 10.1101/2023.10.11.561959 (PMC10614786; doi:10.1101/2023.10.11.561959), 2023-10-16
Supplement: media-1.pdf [file media-1.pdf]

**A.**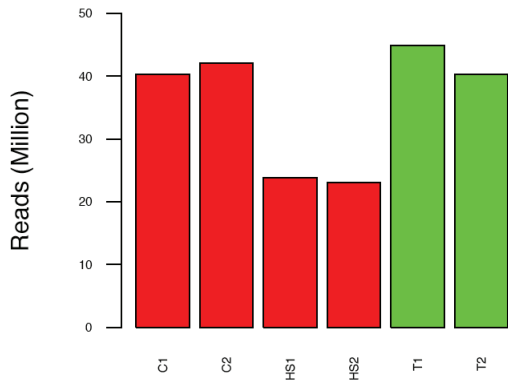**C.**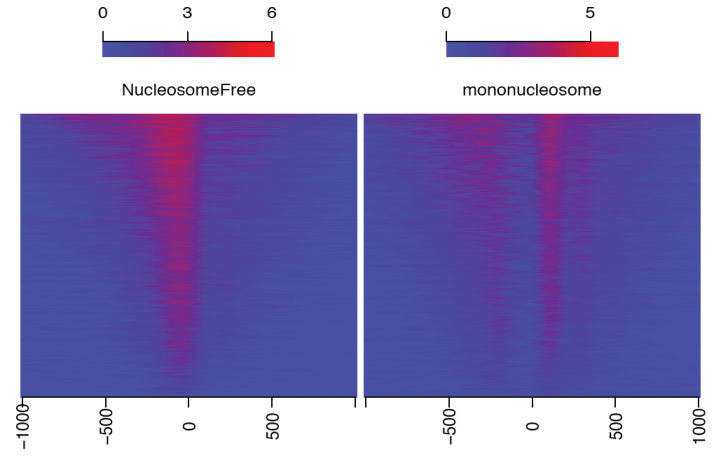**B.**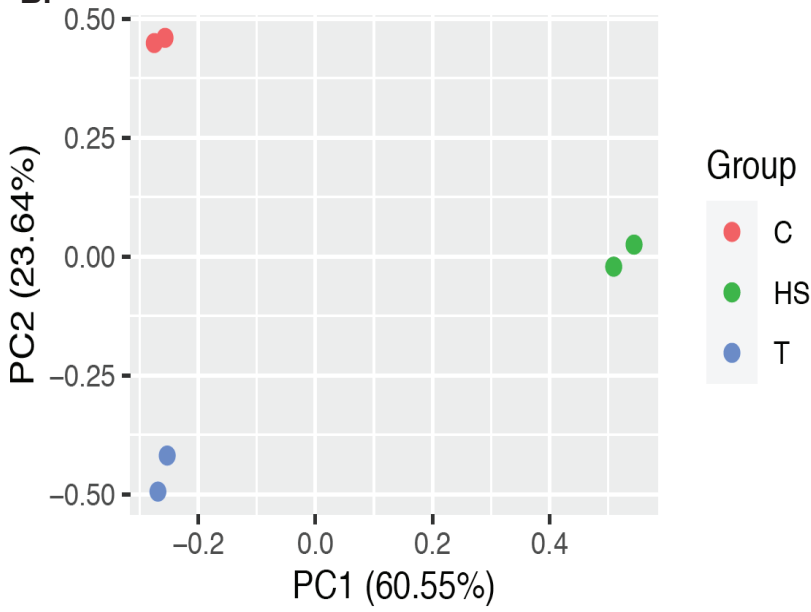**D.**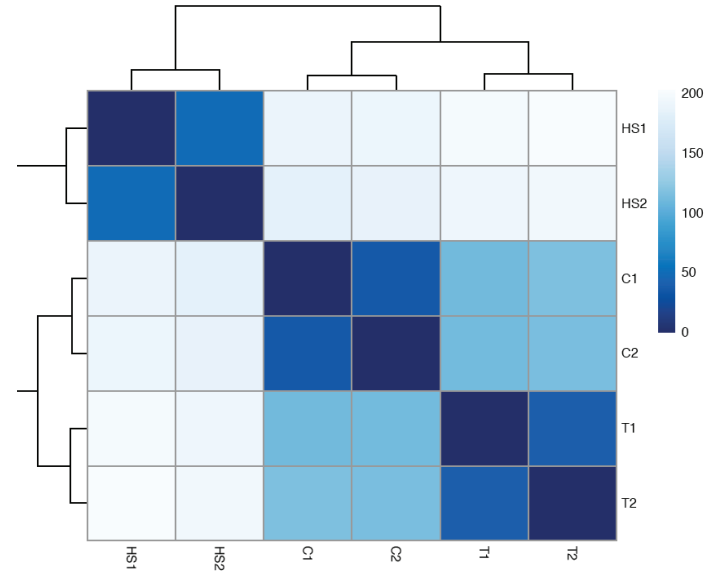

Figure S1. Related to Fig.1. ATAC-seq on HUVEC cells. A. Number of reads assigned to consensus peaks. B. Principal component analysis. C. Control ATAC-seq TSS signal read heatmap. D. Heatmap showing original samples distance.
