# Supplementary material for: Inflammatory stress-mediated chromatin changes underlie dysfunction in endothelial cells
Source: PubMed Central journal article supplement — bioRxiv. 2023 Oct 16:2023.10.11.561959. Preprint. [Version 1] doi: 10.1101/2023.10.11.561959 (PMC10614786; doi:10.1101/2023.10.11.561959), 2023-10-16
Supplement: media-2.pdf [file media-2.pdf]

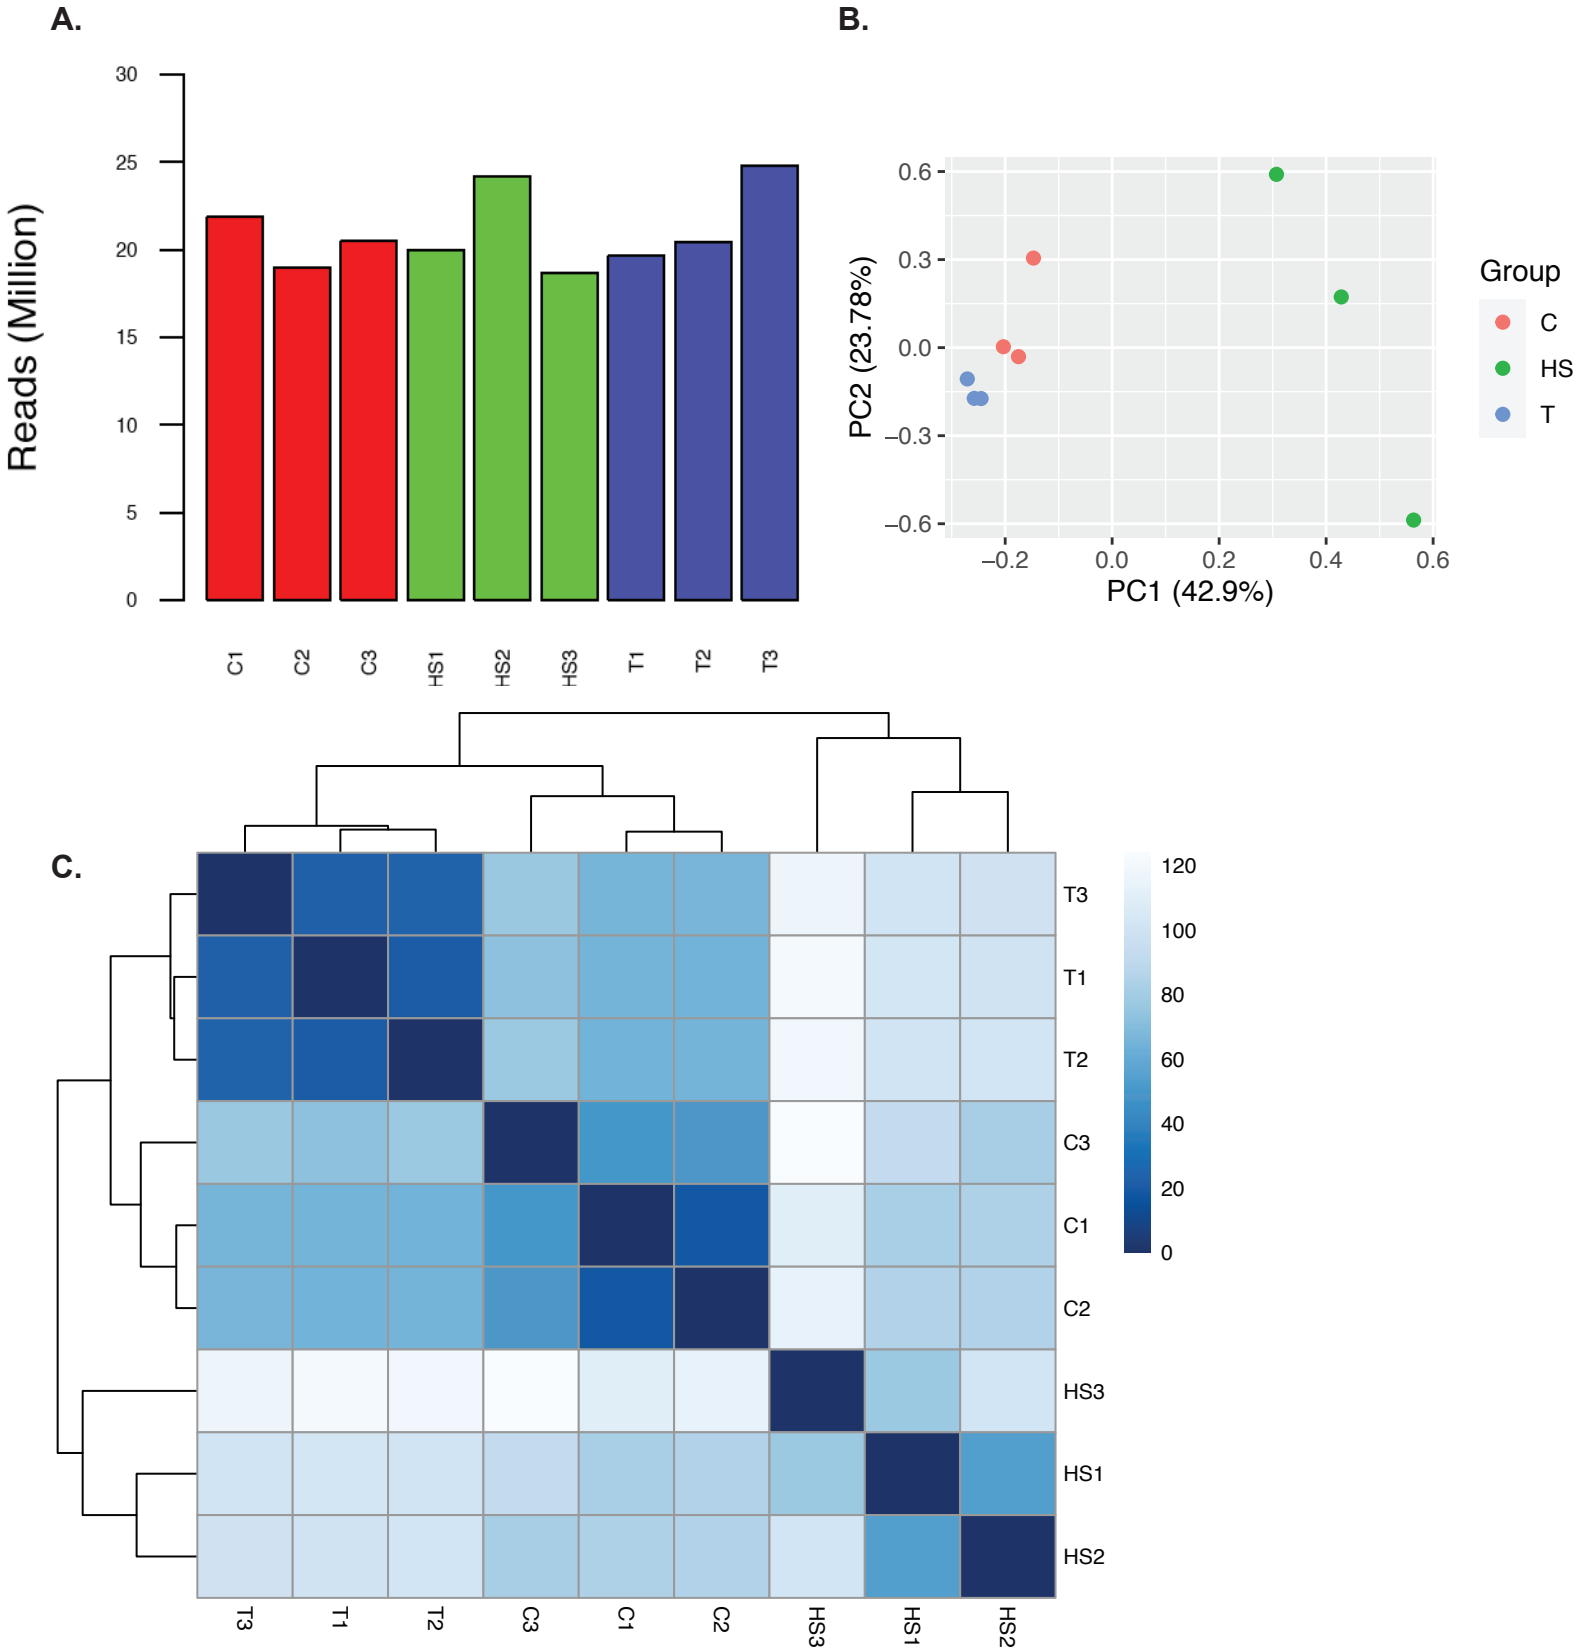

Figure S2. Related to Fig.2. RNA-seq on HUVEC cells. A. Number of reads of the three biological triplicates, where C1, C2, and C3 are control samples from distinct biological replicates; HS1, HS2, HS3 are heat shock samples, and T1, T2, and T3 are samples treated with TNF-alpha. B. Principal component analysis of the three biological replicates. C. Heatmap showing original samples distance.
