# Supplementary material for: Inflammatory stress-mediated chromatin changes underlie dysfunction in endothelial cells
Source: PubMed Central journal article supplement — bioRxiv. 2023 Oct 16:2023.10.11.561959. Preprint. [Version 1] doi: 10.1101/2023.10.11.561959 (PMC10614786; doi:10.1101/2023.10.11.561959), 2023-10-16
Supplement: media-3.pdf [file media-3.pdf]

**ATAC-seq and RNA-seq integrated analysis endothelial cells**

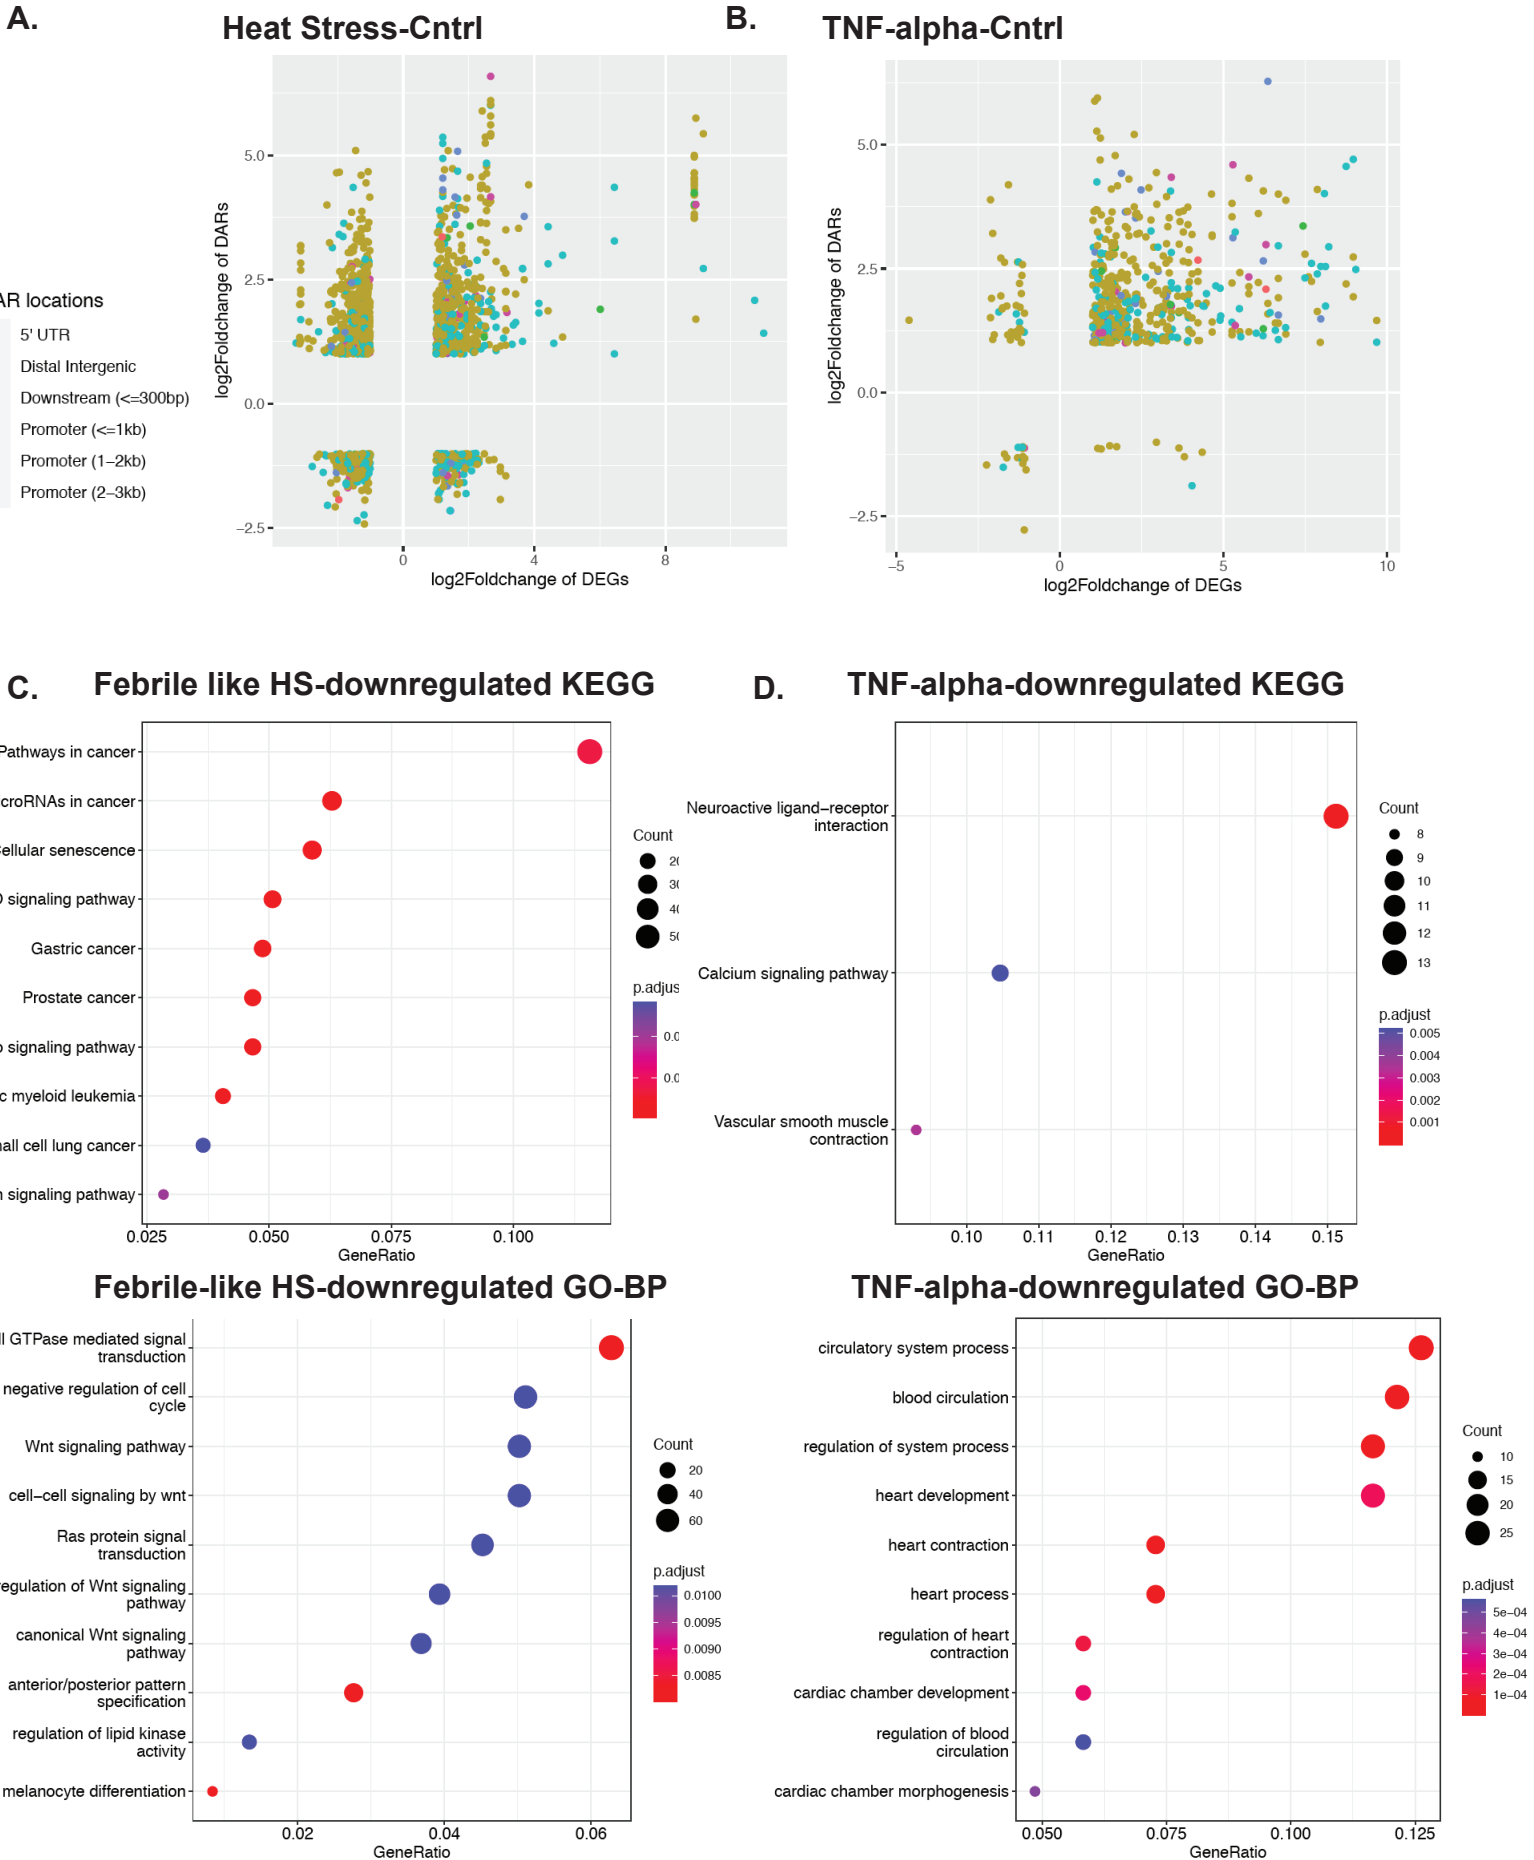

Figure S3. Related to Fig.3. ATAC-seq and RNA-seq integrative analysis. A. Genomic features of ATAC-seq and RNA-seq in HS-C samples. B. Same as A but in T-C samples. C. KEGG and GO-BP analysis of downregulated pathways in HS-C samples. D. Same as C but in T-C samples.
